# Supplementary material for: A novel pH sensor which could respond to multi-scale pH changes via different fluorescence emissions
Source: Royal Society of Chemistry journal article supplement (doi:10.1039/c5nj03114a), 2016-01-01
Supplement: c5nj03114a1.pdf [file c5nj03114a1.pdf]

New Journal of Chemistry

**Electronic Supplementary Information**

**A Novel pH Sensor which Could Respond Multi-Scale pH Changes  
via Different Fluorescence Emissions**

Xin Zhu, Qi Lin,\* Pei Chen, Yong-Peng Fu, You-Ming Zhang, Tai-Bao Wei\*

*Key Laboratory of Eco-Environment-Related Polymer Materials, Ministry of  
Education of China; Key Laboratory of Polymer Materials of Gansu Province;  
College of Chemistry and Chemical Engineering, Northwest Normal University,  
Lanzhou, Gansu, 730070, P. R. China*

**List of Figures**

**Fig. S1** Fluorescence spectra of **L6** in various pH values (pH ranged from 1.0 to 13.0, DMSO/H<sub>2</sub>O (v/v, 1/1) HEPES buffered solution,  $c_{\text{L6}} = 2.0 \times 10^{-5}$  M).

**Fig. S2.** UV-vis absorption of **L6** in various pH values (pH ranged from 1.0 to 13.5, DMSO/H<sub>2</sub>O (v/v, 1/9) HEPES buffered solution,  $c_{\text{L6}} = 2.0 \times 10^{-5}$  M),

**Fig. S3** Fluorescence spectra of **L6** in various pH values (pH ranged from 1.0 to 13.5, DMSO/H<sub>2</sub>O (v/v, 1/9) HEPES buffered solution,  $c_{\text{L6}} = 2.0 \times 10^{-5}$  M).

**Fig. S4** Fluorescence intensity change of **L6** ( $2.0 \times 10^{-5}$  M) at 497 nm upon the addition of different ions (50 equiv. of anions and 10 equiv. of cations, respectively, pH=7.0).

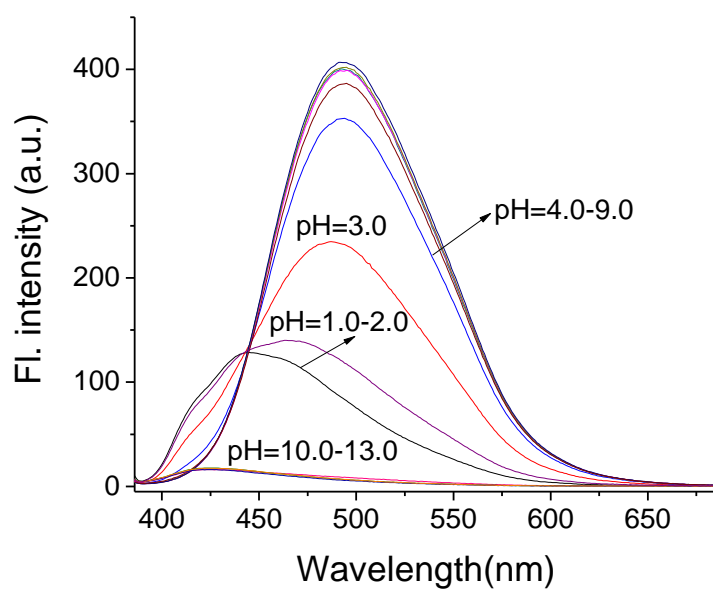

**Fig. S1** Fluorescence spectra of **L6** in various pH values (pH ranged from 1.0 to 13.0, DMSO/H<sub>2</sub>O (v/v, 1/1) HEPES buffered solution,  $c_{\text{L6}} = 2.0 \times 10^{-5}$  M).

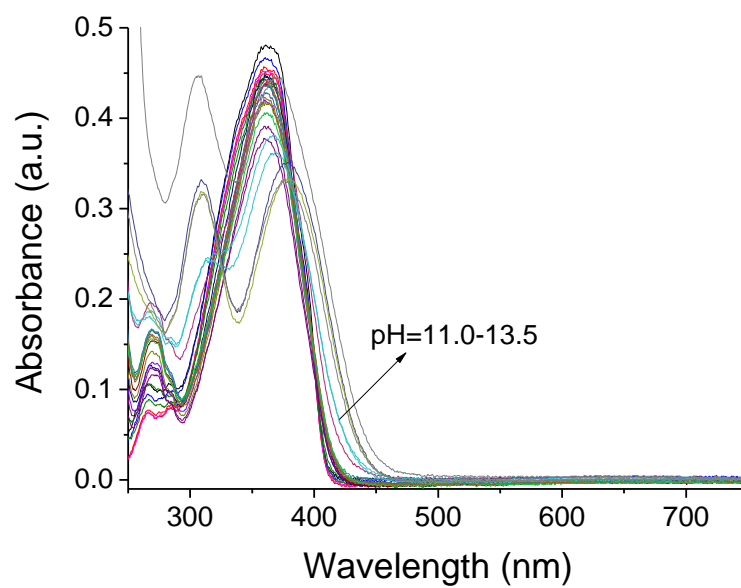

**Fig. S2.** UV-vis absorption of **L6** in various pH values (pH ranged from 1.0 to 13.5, DMSO/H<sub>2</sub>O (v/v, 1/9) HEPES buffered solution,  $c_{\text{L6}} = 2.0 \times 10^{-5}$  M),

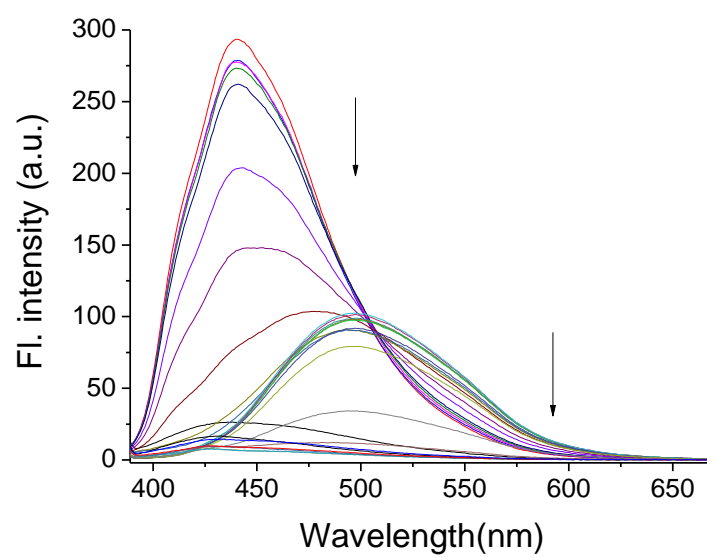

**Fig. S3** Fluorescence spectra of **L6** in various pH values (pH ranged from 1.0 to 13.5, DMSO/H<sub>2</sub>O (v/v, 1/9) HEPES buffered solution,  $c_{\text{L6}} = 2.0 \times 10^{-5}$  M).

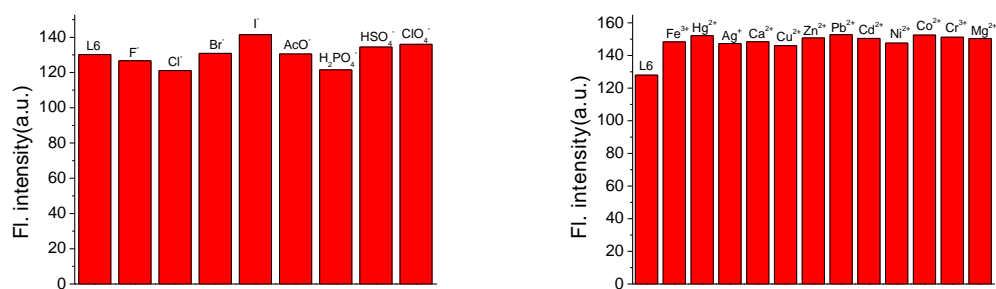

**Fig. S4** Fluorescence intensity change of **L6** ( $2.0 \times 10^{-5}$  M) at 497 nm upon the addition of different ions (50 equiv. of anions and 10 equiv. of cations, respectively, pH=7.0).
